# Supplementary material for: Modeling the influence of carbon branching structure on SOA formation via multiphase reactions of alkanes
Source: Copernicus journal article supplement (doi:10.5194/egusphere-2023-1500), 2023-08-28
Supplement: Supplementary file 1 [file egusphere-2023-1500-supplement.pdf]

## Supplementary material

# Modeling the influence of carbon branching structure on SOA formation via multiphase reactions of alkanes

Azad Madhu<sup>1</sup>, Myoseon Jang<sup>1</sup>, and Yujin Jo<sup>1</sup>

<sup>1</sup>Engineering School of Sustainable Infrastructure and Environment, University of Florida, Gainesville, 32608, United States of America

Correspondence to: Myoseon Jang ([mjang@ufl.edu](mailto:mjang@ufl.edu))

This file includes:

5 Tables

3 Figures

References

## Section S1. Comparison of autoxidation between heptamethyl-nonane and n-C16

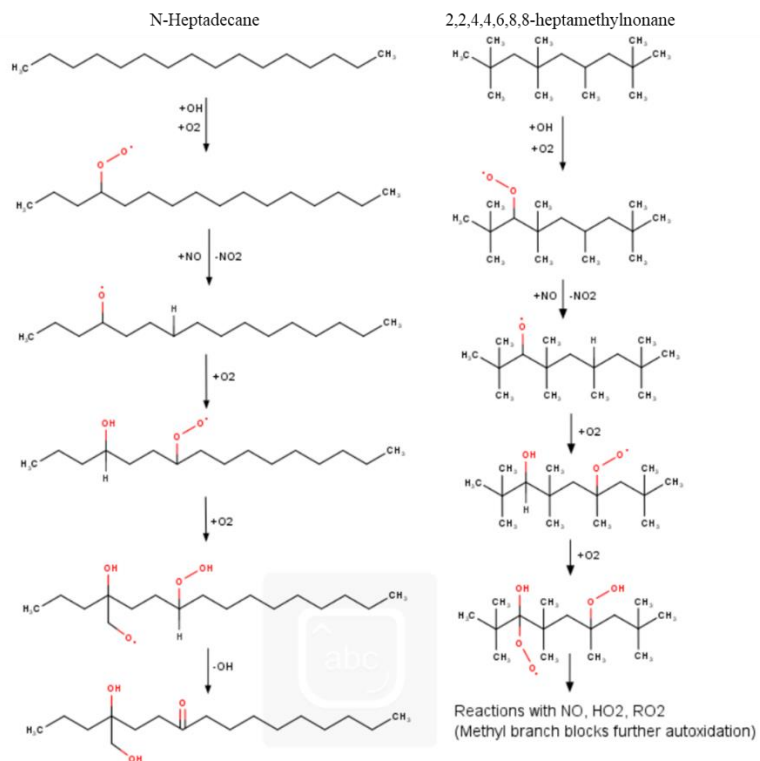

**Figure S1.** Comparison of autoxidation between linear Heptadecane (left) and 2,2,4,4,6,8,8-Heptamethylnonane.

**Section S2. Parameters used to generate lumping arrays and hydroxyl radical rate constants for branched alkanes used in chamber experiments**

**Table S1.** Model parameters used to generate lumping arrays and hydroxyl radical rate constants for branched alkanes used in chamber experiments (Table 1)

| Compound name                    | Autoxidation Reduction Factor | Linear alkane with Closest Vapor Pressure | Reaction Rate with Hydroxyl Radical ( $S^{-1}$ ) <sup>a</sup> | Structure                                                                             |
|----------------------------------|-------------------------------|-------------------------------------------|---------------------------------------------------------------|---------------------------------------------------------------------------------------|
| Isododecane                      | 0.9375                        | C11                                       | 1.39 E-11                                                     | 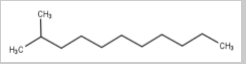   |
| 2,6,10-trimethyldodecane         | 0.78                          | C13                                       | 1.87 E-11                                                     |    |
| 2,2,4,4,6,8,8-heptamethylnonane  | 0.08                          | C11                                       | 0.87 E-11                                                     |   |
| 2,6,10,14-tetramethylpentadecane | 0.75                          | C17                                       | 2.42 E-11                                                     |  |

<sup>a</sup>Rate constants calculated using structure-reactivity relationship (Kwok and Atkinson, 1995)

### Section S3. Physicochemical parameters of lumping species used for branched alkanes

**Table S2.** Molecular weight (MW), oxygen to carbon ratio (O:C), and Hydrogen bonding (HB) of the 48 lumping species used for branched alkane UNIPAR simulations.

| Lumping Group   | MW (g/mol) <sup>a</sup> | O:C <sup>a, b</sup> | HB <sup>a</sup> |
|-----------------|-------------------------|---------------------|-----------------|
| 1VF             | 239.63                  | 0.500               | 0.67            |
| 2VF             | 218.87                  | 0.500               | 0.67            |
| 3VF             | 198.12                  | 0.500               | 0.67            |
| 4VF             | 177.36                  | 0.500               | 0.67            |
| 5VF             | 156.60                  | 0.333               | 0.67            |
| 6VF             | 135.84                  | 0.648               | 0.681842        |
| 7VF             | 115.08                  | 0.899               | 0.625856        |
| 8VF             | 94.33                   | 0.676               | 0.67            |
| 1F              | 138.32                  | 0.500               | 0.67            |
| 2F              | 131.67                  | 0.500               | 0.67            |
| 3F              | 125.02                  | 0.500               | 0.67            |
| 4F              | 118.37                  | 0.563               | 0.5             |
| 5F              | 111.72                  | 0.500               | 0.25            |
| 6F              | 105.07                  | 0.703               | 0.75            |
| 7F              | 98.41                   | 0.583               | 0.666667        |
| 8F              | 91.76                   | 0.557               | 0.67            |
| 1M              | 126.63                  | 0.333               | 0.67            |
| 2M              | 123.87                  | 0.333               | 0.67            |
| 3M              | 121.10                  | 0.333               | 0.67            |
| 4M              | 118.34                  | 0.750               | 1.25            |
| 5M              | 115.57                  | 0.775               | 1.999998        |
| 6M              | 112.81                  | 0.857               | 0.75            |
| 7M              | 110.04                  | 0.424               | 0.966034        |
| 8M              | 107.28                  | 0.270               | 0.136486        |
| 1S <sup>c</sup> | 113.65+10.15*n          | 0.421               | 1.353102        |
| 2S              | 214.89                  | 0.432               | 1.65            |
| 3S              | 203.01                  | 0.434               | 0.774273        |
| 4S              | 191.13                  | 0.436               | 1.273461        |
| 5S              | 179.25                  | 0.180               | 0.999851        |
| 6S              | 167.37                  | 0.533               | 0.4716          |
| 7S              | 155.49                  | 0.301               | 0.496453        |
| 8S              | 143.61                  | 0.548               | 0.061368        |
| 1P <sup>c</sup> | 105.17+14.5*n           | 0.498               | 1.500002        |
| 2P              | 218.63                  | 0.630               | 1.650003        |
| 3P              | 207.09                  | 0.761               | 0.937543        |
| 4P              | 195.55                  | 0.360               | 0.62506         |
| 5P              | 184.01                  | 0.521               | 0.743975        |

|     |        |       |          |
|-----|--------|-------|----------|
| 6P  | 172.46 | 0.581 | 0.41964  |
| 7P  | 160.92 | 0.562 | 0.315915 |
| 8P  | 149.38 | 1.772 | 0.239521 |
| 1MA | 210.18 | 0.330 | 3        |
| 2MA | 198.63 | 0.330 | 3        |
| 3MA | 106.12 | 0.750 | 3        |
| 4MA | 120.40 | 0.621 | 3        |
| 5MA | 164.01 | 0.330 | 3        |
| 6MA | 152.46 | 0.330 | 3        |
| 7MA | 140.92 | 0.330 | 3        |
| 8MA | 129.38 | 0.330 | 3        |

<sup>a</sup> The unified parameter arrays were calculated by Madhu et al. (2023) as an average of the respective arrays generated from lumping explicit species from mechanisms of linear alkanes C9 to C12. Any parameters for lumping groups not populated by chemical species were extrapolated from adjacent groups within the same reactivity scale. <sup>b</sup> This table displays the base unified O:C array. Before application to the branched alkane UNIPAR model, an O:C reduction factor was applied to this array according to Eq. S1 below. <sup>c</sup> MW values for groups 1S and 1P were calculated as a function of their carbon number (n). Further description can be found below.

Table S2. displays the physicochemical parameters associated with the alkane UNIPAR model. These parameters were generated in the unification process described by Madhu et al. (2023). Within the molecular weight (MW) array, lumping groups 1P and 1S are incremented according to carbon number (n). This incrementation is fit to the incrementation of the respective 1P and 1S lumped arrays of explicitly predicted products of the mechanisms of linear alkanes C9-C12. The MWs of all volatility groups with higher vapor pressures (VP) values than group 1 are static. This is due to the assumption that, as MW increases, volatility will decrease as well, causing the higher MW species to automatically shift down to lower volatility groups. Thus, all but the lowest volatility group should have roughly the same MW value as the carbon number of the precursor increases. Groups 1VF, 1F, 1M, and 1MA were not incremented in this way as they were not sufficiently populated to fit.

As carbon number increases of an alkane precursor increases, oxygen-to-carbon ratio (O:C) values of the respective products, and thus lumping arrays, will also decrease. To account for this, an O:C reduction factor was applied to branched alkane O:C arrays which was calculated as follows:

$$O:C \text{ reduction factor} = 10.5/n \quad (\text{Eq. S1})$$

which was applied by multiplying the O:C array displayed in table S2 by multiplying by this factor for each respective branched alkane. The numerator, 10.5, was chosen as the representative carbon number of the base O:C array as it is an average generated from the mechanisms of linear C9-C12.







Table S3. (continued)

| Isododecane Aged |                     |                |                |                |                      |                |                |                |
|------------------|---------------------|----------------|----------------|----------------|----------------------|----------------|----------------|----------------|
| Lumped Species   | Low NO <sub>x</sub> |                |                |                | High NO <sub>x</sub> |                |                |                |
|                  | A <sup>a</sup>      | B <sup>a</sup> | C <sup>a</sup> | D <sup>a</sup> | A <sup>a</sup>       | B <sup>a</sup> | C <sup>a</sup> | D <sup>a</sup> |
| 1VF              | 0.00E+00            | 0.00E+00       | 0.00E+00       | 0.00E+00       | 0.00E+00             | 0.00E+00       | 0.00E+00       | 0.00E+00       |
| 2VF              | 0.00E+00            | 0.00E+00       | 0.00E+00       | 0.00E+00       | 0.00E+00             | 0.00E+00       | 0.00E+00       | 0.00E+00       |
| 3VF              | 0.00E+00            | 0.00E+00       | 0.00E+00       | 0.00E+00       | 0.00E+00             | 0.00E+00       | 0.00E+00       | 0.00E+00       |
| 4VF              | 0.00E+00            | 0.00E+00       | 0.00E+00       | 0.00E+00       | 0.00E+00             | 0.00E+00       | 0.00E+00       | 0.00E+00       |
| 5VF              | 0.00E+00            | 0.00E+00       | 0.00E+00       | 0.00E+00       | 0.00E+00             | 0.00E+00       | 0.00E+00       | 0.00E+00       |
| 6VF              | 0.00E+00            | 0.00E+00       | 0.00E+00       | 0.00E+00       | 0.00E+00             | 0.00E+00       | 0.00E+00       | 0.00E+00       |
| 7VF              | 0.00E+00            | 0.00E+00       | 0.00E+00       | 0.00E+00       | 0.00E+00             | 0.00E+00       | 0.00E+00       | 0.00E+00       |
| 8VF              | 0.00E+00            | 0.00E+00       | 0.00E+00       | 0.00E+00       | 0.00E+00             | 0.00E+00       | 0.00E+00       | 0.00E+00       |
| 1F               | 0.00E+00            | 0.00E+00       | 0.00E+00       | 0.00E+00       | 0.00E+00             | 0.00E+00       | 0.00E+00       | 0.00E+00       |
| 2F               | 0.00E+00            | 0.00E+00       | 0.00E+00       | 0.00E+00       | 0.00E+00             | 0.00E+00       | 0.00E+00       | 0.00E+00       |
| 3F               | 0.00E+00            | 0.00E+00       | 0.00E+00       | 0.00E+00       | 0.00E+00             | 0.00E+00       | 0.00E+00       | 0.00E+00       |
| 4F               | 0.00E+00            | 0.00E+00       | 0.00E+00       | 0.00E+00       | 0.00E+00             | 0.00E+00       | 0.00E+00       | 0.00E+00       |
| 5F               | 0.00E+00            | 0.00E+00       | 0.00E+00       | 0.00E+00       | 0.00E+00             | 0.00E+00       | 0.00E+00       | 0.00E+00       |
| 6F               | 0.00E+00            | 0.00E+00       | 0.00E+00       | 0.00E+00       | 0.00E+00             | 0.00E+00       | 0.00E+00       | 0.00E+00       |
| 7F               | 0.00E+00            | 0.00E+00       | 0.00E+00       | 0.00E+00       | 0.00E+00             | 0.00E+00       | 0.00E+00       | 0.00E+00       |
| 8F               | 0.00E+00            | 0.00E+00       | 0.00E+00       | 0.00E+00       | 0.00E+00             | 0.00E+00       | 0.00E+00       | 0.00E+00       |
| 1M               | 0.00E+00            | 0.00E+00       | 0.00E+00       | 0.00E+00       | 0.00E+00             | 0.00E+00       | 0.00E+00       | 0.00E+00       |
| 2M               | 0.00E+00            | 0.00E+00       | 0.00E+00       | 0.00E+00       | 0.00E+00             | 0.00E+00       | 0.00E+00       | 0.00E+00       |
| 3M               | 0.00E+00            | 0.00E+00       | 0.00E+00       | 0.00E+00       | 0.00E+00             | 0.00E+00       | 0.00E+00       | 0.00E+00       |
| 4M               | 0.00E+00            | 0.00E+00       | 0.00E+00       | 0.00E+00       | 0.00E+00             | 0.00E+00       | 0.00E+00       | 0.00E+00       |
| 5M               | -2.91E-09           | 2.56E-07       | -7.47E-06      | 3.48E-04       | -9.63E-07            | 1.75E-05       | -1.13E-04      | 5.70E-04       |
| 6M               | -4.73E-08           | 4.47E-06       | -1.61E-04      | 6.27E-03       | -1.04E-05            | 2.00E-04       | -1.44E-03      | 9.18E-03       |
| 7M               | -7.99E-08           | 7.59E-06       | -2.78E-04      | 1.07E-02       | -1.67E-05            | 3.25E-04       | -2.38E-03      | 1.55E-02       |
| 8M               | -3.41E-08           | 3.25E-06       | -1.20E-04      | 4.57E-03       | -7.00E-06            | 1.37E-04       | -1.01E-03      | 6.61E-03       |



Table S3. (continued)

| 2,6,10-Trimethyldodecane Fresh |                     |                |                |                |                      |                |                |                |
|--------------------------------|---------------------|----------------|----------------|----------------|----------------------|----------------|----------------|----------------|
| Lumped Species                 | Low NO <sub>x</sub> |                |                |                | High NO <sub>x</sub> |                |                |                |
|                                | A <sup>a</sup>      | B <sup>a</sup> | C <sup>a</sup> | D <sup>a</sup> | A <sup>a</sup>       | B <sup>a</sup> | C <sup>a</sup> | D <sup>a</sup> |
| 1VF                            | 0.00E+00            | 0.00E+00       | 0.00E+00       | 0.00E+00       | 0.00E+00             | 0.00E+00       | 0.00E+00       | 0.00E+00       |
| 2VF                            | 0.00E+00            | 0.00E+00       | 0.00E+00       | 0.00E+00       | 0.00E+00             | 0.00E+00       | 0.00E+00       | 0.00E+00       |
| 3VF                            | 0.00E+00            | 0.00E+00       | 0.00E+00       | 0.00E+00       | 0.00E+00             | 0.00E+00       | 0.00E+00       | 0.00E+00       |
| 4VF                            | 0.00E+00            | 0.00E+00       | 0.00E+00       | 0.00E+00       | 0.00E+00             | 0.00E+00       | 0.00E+00       | 0.00E+00       |
| 5VF                            | 0.00E+00            | 0.00E+00       | 0.00E+00       | 0.00E+00       | 0.00E+00             | 0.00E+00       | 0.00E+00       | 0.00E+00       |
| 6VF                            | 0.00E+00            | 0.00E+00       | 0.00E+00       | 0.00E+00       | 0.00E+00             | 0.00E+00       | 0.00E+00       | 0.00E+00       |
| 7VF                            | 0.00E+00            | 0.00E+00       | 0.00E+00       | 0.00E+00       | 0.00E+00             | 0.00E+00       | 0.00E+00       | 0.00E+00       |
| 8VF                            | 0.00E+00            | 0.00E+00       | 0.00E+00       | 0.00E+00       | 0.00E+00             | 0.00E+00       | 0.00E+00       | 0.00E+00       |
| 1F                             | 0.00E+00            | 0.00E+00       | 0.00E+00       | 0.00E+00       | 0.00E+00             | 0.00E+00       | 0.00E+00       | 0.00E+00       |
| 2F                             | 0.00E+00            | 0.00E+00       | 0.00E+00       | 0.00E+00       | 0.00E+00             | 0.00E+00       | 0.00E+00       | 0.00E+00       |
| 3F                             | 0.00E+00            | 0.00E+00       | 0.00E+00       | 0.00E+00       | 0.00E+00             | 0.00E+00       | 0.00E+00       | 0.00E+00       |
| 4F                             | 0.00E+00            | 0.00E+00       | 0.00E+00       | 0.00E+00       | 0.00E+00             | 0.00E+00       | 0.00E+00       | 0.00E+00       |
| 5F                             | 0.00E+00            | 0.00E+00       | 0.00E+00       | 0.00E+00       | 0.00E+00             | 0.00E+00       | 0.00E+00       | 0.00E+00       |
| 6F                             | 0.00E+00            | 0.00E+00       | 0.00E+00       | 0.00E+00       | 0.00E+00             | 0.00E+00       | 0.00E+00       | 0.00E+00       |
| 7F                             | 0.00E+00            | 0.00E+00       | 0.00E+00       | 0.00E+00       | 0.00E+00             | 0.00E+00       | 0.00E+00       | 0.00E+00       |
| 8F                             | 0.00E+00            | 0.00E+00       | 0.00E+00       | 0.00E+00       | 0.00E+00             | 0.00E+00       | 0.00E+00       | 0.00E+00       |
| 1M                             | 0.00E+00            | 0.00E+00       | 0.00E+00       | 0.00E+00       | 0.00E+00             | 0.00E+00       | 0.00E+00       | 0.00E+00       |
| 2M                             | 0.00E+00            | 0.00E+00       | 0.00E+00       | 0.00E+00       | 0.00E+00             | 0.00E+00       | 0.00E+00       | 0.00E+00       |
| 3M                             | 0.00E+00            | 0.00E+00       | 0.00E+00       | 0.00E+00       | 0.00E+00             | 0.00E+00       | 0.00E+00       | 0.00E+00       |
| 4M                             | 0.00E+00            | 0.00E+00       | 0.00E+00       | 0.00E+00       | 0.00E+00             | 0.00E+00       | 0.00E+00       | 0.00E+00       |
| 5M                             | 0.00E+00            | 0.00E+00       | 0.00E+00       | 0.00E+00       | 0.00E+00             | 0.00E+00       | 0.00E+00       | 0.00E+00       |
| 6M                             | -3.94E-09           | 3.80E-07       | -7.79E-06      | 5.09E-04       | -6.34E-07            | 1.16E-05       | -7.29E-05      | 6.34E-04       |
| 7M                             | -1.01E-08           | 9.66E-07       | -1.93E-05      | 1.33E-03       | -1.64E-06            | 3.00E-05       | -1.86E-04      | 1.65E-03       |
| 8M                             | -7.64E-09           | 7.31E-07       | -1.44E-05      | 1.02E-03       | -1.25E-06            | 2.29E-05       | -1.41E-04      | 1.26E-03       |



Table S3. (continued)

| 2,6,10-Trimethyldodecane Aged |                     |                |                |                |                      |                |                |                |
|-------------------------------|---------------------|----------------|----------------|----------------|----------------------|----------------|----------------|----------------|
| Lumped Species                | Low NO <sub>x</sub> |                |                |                | High NO <sub>x</sub> |                |                |                |
|                               | A <sup>a</sup>      | B <sup>a</sup> | C <sup>a</sup> | D <sup>a</sup> | A <sup>a</sup>       | B <sup>a</sup> | C <sup>a</sup> | D <sup>a</sup> |
| 1VF                           | 0.00E+00            | 0.00E+00       | 0.00E+00       | 0.00E+00       | 0.00E+00             | 0.00E+00       | 0.00E+00       | 0.00E+00       |
| 2VF                           | 0.00E+00            | 0.00E+00       | 0.00E+00       | 0.00E+00       | 0.00E+00             | 0.00E+00       | 0.00E+00       | 0.00E+00       |
| 3VF                           | 0.00E+00            | 0.00E+00       | 0.00E+00       | 0.00E+00       | 0.00E+00             | 0.00E+00       | 0.00E+00       | 0.00E+00       |
| 4VF                           | 0.00E+00            | 0.00E+00       | 0.00E+00       | 0.00E+00       | 0.00E+00             | 0.00E+00       | 0.00E+00       | 0.00E+00       |
| 5VF                           | 0.00E+00            | 0.00E+00       | 0.00E+00       | 0.00E+00       | 0.00E+00             | 0.00E+00       | 0.00E+00       | 0.00E+00       |
| 6VF                           | 0.00E+00            | 0.00E+00       | 0.00E+00       | 0.00E+00       | 0.00E+00             | 0.00E+00       | 0.00E+00       | 0.00E+00       |
| 7VF                           | 0.00E+00            | 0.00E+00       | 0.00E+00       | 0.00E+00       | 0.00E+00             | 0.00E+00       | 0.00E+00       | 0.00E+00       |
| 8VF                           | 0.00E+00            | 0.00E+00       | 0.00E+00       | 0.00E+00       | 0.00E+00             | 0.00E+00       | 0.00E+00       | 0.00E+00       |
| 1F                            | 0.00E+00            | 0.00E+00       | 0.00E+00       | 0.00E+00       | 0.00E+00             | 0.00E+00       | 0.00E+00       | 0.00E+00       |
| 2F                            | 0.00E+00            | 0.00E+00       | 0.00E+00       | 0.00E+00       | 0.00E+00             | 0.00E+00       | 0.00E+00       | 0.00E+00       |
| 3F                            | 0.00E+00            | 0.00E+00       | 0.00E+00       | 0.00E+00       | 0.00E+00             | 0.00E+00       | 0.00E+00       | 0.00E+00       |
| 4F                            | 0.00E+00            | 0.00E+00       | 0.00E+00       | 0.00E+00       | 0.00E+00             | 0.00E+00       | 0.00E+00       | 0.00E+00       |
| 5F                            | 0.00E+00            | 0.00E+00       | 0.00E+00       | 0.00E+00       | 0.00E+00             | 0.00E+00       | 0.00E+00       | 0.00E+00       |
| 6F                            | 0.00E+00            | 0.00E+00       | 0.00E+00       | 0.00E+00       | 0.00E+00             | 0.00E+00       | 0.00E+00       | 0.00E+00       |
| 7F                            | 0.00E+00            | 0.00E+00       | 0.00E+00       | 0.00E+00       | 0.00E+00             | 0.00E+00       | 0.00E+00       | 0.00E+00       |
| 8F                            | 0.00E+00            | 0.00E+00       | 0.00E+00       | 0.00E+00       | 0.00E+00             | 0.00E+00       | 0.00E+00       | 0.00E+00       |
| 1M                            | 0.00E+00            | 0.00E+00       | 0.00E+00       | 0.00E+00       | 0.00E+00             | 0.00E+00       | 0.00E+00       | 0.00E+00       |
| 2M                            | 0.00E+00            | 0.00E+00       | 0.00E+00       | 0.00E+00       | 0.00E+00             | 0.00E+00       | 0.00E+00       | 0.00E+00       |
| 3M                            | 0.00E+00            | 0.00E+00       | 0.00E+00       | 0.00E+00       | 0.00E+00             | 0.00E+00       | 0.00E+00       | 0.00E+00       |
| 4M                            | -4.24E-09           | 4.68E-07       | -1.92E-05      | 9.10E-04       | -1.02E-06            | 2.29E-05       | -1.90E-04      | 1.36E-03       |
| 5M                            | -1.96E-08           | 2.18E-06       | -9.29E-05      | 4.28E-03       | -4.32E-06            | 9.84E-05       | -8.38E-04      | 6.28E-03       |
| 6M                            | -3.67E-08           | 4.11E-06       | -1.77E-04      | 8.08E-03       | -7.78E-06            | 1.79E-04       | -1.54E-03      | 1.17E-02       |
| 7M                            | -3.00E-08           | 3.37E-06       | -1.46E-04      | 6.62E-03       | -6.22E-06            | 1.43E-04       | -1.24E-03      | 9.59E-03       |
| 8M                            | -8.78E-09           | 9.88E-07       | -4.30E-05      | 1.94E-03       | -1.80E-06            | 4.16E-05       | -3.62E-04      | 2.81E-03       |



Table S3. (continued)

| 2,2,4,4,6,8,8-Heptamethylnonane Fresh |                     |                |                |                |                      |                |                |                |
|---------------------------------------|---------------------|----------------|----------------|----------------|----------------------|----------------|----------------|----------------|
| Lumped Species                        | Low NO <sub>x</sub> |                |                |                | High NO <sub>x</sub> |                |                |                |
|                                       | A <sup>a</sup>      | B <sup>a</sup> | C <sup>a</sup> | D <sup>a</sup> | A <sup>a</sup>       | B <sup>a</sup> | C <sup>a</sup> | D <sup>a</sup> |
| 1VF                                   | 0.00E+00            | 0.00E+00       | 0.00E+00       | 0.00E+00       | 0.00E+00             | 0.00E+00       | 0.00E+00       | 0.00E+00       |
| 2VF                                   | 0.00E+00            | 0.00E+00       | 0.00E+00       | 0.00E+00       | 0.00E+00             | 0.00E+00       | 0.00E+00       | 0.00E+00       |
| 3VF                                   | 0.00E+00            | 0.00E+00       | 0.00E+00       | 0.00E+00       | 0.00E+00             | 0.00E+00       | 0.00E+00       | 0.00E+00       |
| 4VF                                   | 0.00E+00            | 0.00E+00       | 0.00E+00       | 0.00E+00       | 0.00E+00             | 0.00E+00       | 0.00E+00       | 0.00E+00       |
| 5VF                                   | 0.00E+00            | 0.00E+00       | 0.00E+00       | 0.00E+00       | 0.00E+00             | 0.00E+00       | 0.00E+00       | 0.00E+00       |
| 6VF                                   | 0.00E+00            | 0.00E+00       | 0.00E+00       | 0.00E+00       | 0.00E+00             | 0.00E+00       | 0.00E+00       | 0.00E+00       |
| 7VF                                   | 0.00E+00            | 0.00E+00       | 0.00E+00       | 0.00E+00       | 0.00E+00             | 0.00E+00       | 0.00E+00       | 0.00E+00       |
| 8VF                                   | 0.00E+00            | 0.00E+00       | 0.00E+00       | 0.00E+00       | 0.00E+00             | 0.00E+00       | 0.00E+00       | 0.00E+00       |
| 1F                                    | 0.00E+00            | 0.00E+00       | 0.00E+00       | 0.00E+00       | 0.00E+00             | 0.00E+00       | 0.00E+00       | 0.00E+00       |
| 2F                                    | 0.00E+00            | 0.00E+00       | 0.00E+00       | 0.00E+00       | 0.00E+00             | 0.00E+00       | 0.00E+00       | 0.00E+00       |
| 3F                                    | 0.00E+00            | 0.00E+00       | 0.00E+00       | 0.00E+00       | 0.00E+00             | 0.00E+00       | 0.00E+00       | 0.00E+00       |
| 4F                                    | 0.00E+00            | 0.00E+00       | 0.00E+00       | 0.00E+00       | 0.00E+00             | 0.00E+00       | 0.00E+00       | 0.00E+00       |
| 5F                                    | 0.00E+00            | 0.00E+00       | 0.00E+00       | 0.00E+00       | 0.00E+00             | 0.00E+00       | 0.00E+00       | 0.00E+00       |
| 6F                                    | 0.00E+00            | 0.00E+00       | 0.00E+00       | 0.00E+00       | 0.00E+00             | 0.00E+00       | 0.00E+00       | 0.00E+00       |
| 7F                                    | 0.00E+00            | 0.00E+00       | 0.00E+00       | 0.00E+00       | 0.00E+00             | 0.00E+00       | 0.00E+00       | 0.00E+00       |
| 8F                                    | 0.00E+00            | 0.00E+00       | 0.00E+00       | 0.00E+00       | 0.00E+00             | 0.00E+00       | 0.00E+00       | 0.00E+00       |
| 1M                                    | 0.00E+00            | 0.00E+00       | 0.00E+00       | 0.00E+00       | 0.00E+00             | 0.00E+00       | 0.00E+00       | 0.00E+00       |
| 2M                                    | 0.00E+00            | 0.00E+00       | 0.00E+00       | 0.00E+00       | 0.00E+00             | 0.00E+00       | 0.00E+00       | 0.00E+00       |
| 3M                                    | 0.00E+00            | 0.00E+00       | 0.00E+00       | 0.00E+00       | 0.00E+00             | 0.00E+00       | 0.00E+00       | 0.00E+00       |
| 4M                                    | 0.00E+00            | 0.00E+00       | 0.00E+00       | 0.00E+00       | 0.00E+00             | 0.00E+00       | 0.00E+00       | 0.00E+00       |
| 5M                                    | 0.00E+00            | 0.00E+00       | 0.00E+00       | 0.00E+00       | 0.00E+00             | 0.00E+00       | 0.00E+00       | 0.00E+00       |
| 6M                                    | -4.06E-09           | 3.33E-07       | -5.93E-06      | 3.10E-04       | -6.46E-07            | 1.01E-05       | -5.39E-05      | 3.89E-04       |
| 7M                                    | -1.70E-08           | 1.38E-06       | -2.34E-05      | 1.36E-03       | -2.78E-06            | 4.29E-05       | -2.25E-04      | 1.69E-03       |
| 8M                                    | -1.55E-08           | 1.26E-06       | -2.10E-05      | 1.26E-03       | -2.55E-06            | 3.94E-05       | -2.05E-04      | 1.56E-03       |





Table S3. (continued)

| 2,2,4,4,6,8,8-Heptamethylnonane Aged |                     |                |                |                |                      |                |                |                |
|--------------------------------------|---------------------|----------------|----------------|----------------|----------------------|----------------|----------------|----------------|
| Lumped Species                       | Low NO <sub>x</sub> |                |                |                | High NO <sub>x</sub> |                |                |                |
|                                      | A <sup>a</sup>      | B <sup>a</sup> | C <sup>a</sup> | D <sup>a</sup> | A <sup>a</sup>       | B <sup>a</sup> | C <sup>a</sup> | D <sup>a</sup> |
| 1VF                                  | 0.00E+00            | 0.00E+00       | 0.00E+00       | 0.00E+00       | 0.00E+00             | 0.00E+00       | 0.00E+00       | 0.00E+00       |
| 2VF                                  | 0.00E+00            | 0.00E+00       | 0.00E+00       | 0.00E+00       | 0.00E+00             | 0.00E+00       | 0.00E+00       | 0.00E+00       |
| 3VF                                  | 0.00E+00            | 0.00E+00       | 0.00E+00       | 0.00E+00       | 0.00E+00             | 0.00E+00       | 0.00E+00       | 0.00E+00       |
| 4VF                                  | 0.00E+00            | 0.00E+00       | 0.00E+00       | 0.00E+00       | 0.00E+00             | 0.00E+00       | 0.00E+00       | 0.00E+00       |
| 5VF                                  | 0.00E+00            | 0.00E+00       | 0.00E+00       | 0.00E+00       | 0.00E+00             | 0.00E+00       | 0.00E+00       | 0.00E+00       |
| 6VF                                  | 0.00E+00            | 0.00E+00       | 0.00E+00       | 0.00E+00       | 0.00E+00             | 0.00E+00       | 0.00E+00       | 0.00E+00       |
| 7VF                                  | 0.00E+00            | 0.00E+00       | 0.00E+00       | 0.00E+00       | 0.00E+00             | 0.00E+00       | 0.00E+00       | 0.00E+00       |
| 8VF                                  | 0.00E+00            | 0.00E+00       | 0.00E+00       | 0.00E+00       | 0.00E+00             | 0.00E+00       | 0.00E+00       | 0.00E+00       |
| 1F                                   | 0.00E+00            | 0.00E+00       | 0.00E+00       | 0.00E+00       | 0.00E+00             | 0.00E+00       | 0.00E+00       | 0.00E+00       |
| 2F                                   | 0.00E+00            | 0.00E+00       | 0.00E+00       | 0.00E+00       | 0.00E+00             | 0.00E+00       | 0.00E+00       | 0.00E+00       |
| 3F                                   | 0.00E+00            | 0.00E+00       | 0.00E+00       | 0.00E+00       | 0.00E+00             | 0.00E+00       | 0.00E+00       | 0.00E+00       |
| 4F                                   | 0.00E+00            | 0.00E+00       | 0.00E+00       | 0.00E+00       | 0.00E+00             | 0.00E+00       | 0.00E+00       | 0.00E+00       |
| 5F                                   | 0.00E+00            | 0.00E+00       | 0.00E+00       | 0.00E+00       | 0.00E+00             | 0.00E+00       | 0.00E+00       | 0.00E+00       |
| 6F                                   | 0.00E+00            | 0.00E+00       | 0.00E+00       | 0.00E+00       | 0.00E+00             | 0.00E+00       | 0.00E+00       | 0.00E+00       |
| 7F                                   | 0.00E+00            | 0.00E+00       | 0.00E+00       | 0.00E+00       | 0.00E+00             | 0.00E+00       | 0.00E+00       | 0.00E+00       |
| 8F                                   | 0.00E+00            | 0.00E+00       | 0.00E+00       | 0.00E+00       | 0.00E+00             | 0.00E+00       | 0.00E+00       | 0.00E+00       |
| 1M                                   | 0.00E+00            | 0.00E+00       | 0.00E+00       | 0.00E+00       | 0.00E+00             | 0.00E+00       | 0.00E+00       | 0.00E+00       |
| 2M                                   | 0.00E+00            | 0.00E+00       | 0.00E+00       | 0.00E+00       | 0.00E+00             | 0.00E+00       | 0.00E+00       | 0.00E+00       |
| 3M                                   | 0.00E+00            | 0.00E+00       | 0.00E+00       | 0.00E+00       | 0.00E+00             | 0.00E+00       | 0.00E+00       | 0.00E+00       |
| 4M                                   | 0.00E+00            | 0.00E+00       | 0.00E+00       | 0.00E+00       | 0.00E+00             | 0.00E+00       | 0.00E+00       | 0.00E+00       |
| 5M                                   | -2.91E-09           | 2.56E-07       | -7.47E-06      | 3.48E-04       | -9.63E-07            | 1.75E-05       | -1.13E-04      | 5.70E-04       |
| 6M                                   | -4.73E-08           | 4.47E-06       | -1.61E-04      | 6.27E-03       | -1.04E-05            | 2.00E-04       | -1.44E-03      | 9.18E-03       |
| 7M                                   | -7.99E-08           | 7.59E-06       | -2.78E-04      | 1.07E-02       | -1.67E-05            | 3.25E-04       | -2.38E-03      | 1.55E-02       |



Table S3. (continued)

| 2,6,10,14-Tetramethylpentadecane Fresh |                     |                |                |                |                      |                |                |                |
|----------------------------------------|---------------------|----------------|----------------|----------------|----------------------|----------------|----------------|----------------|
| Lumped Species                         | Low NO <sub>x</sub> |                |                |                | High NO <sub>x</sub> |                |                |                |
|                                        | A <sup>a</sup>      | B <sup>a</sup> | C <sup>a</sup> | D <sup>a</sup> | A <sup>a</sup>       | B <sup>a</sup> | C <sup>a</sup> | D <sup>a</sup> |
| 1VF                                    | 0.00E+00            | 0.00E+00       | 0.00E+00       | 0.00E+00       | 0.00E+00             | 0.00E+00       | 0.00E+00       | 0.00E+00       |
| 2VF                                    | 0.00E+00            | 0.00E+00       | 0.00E+00       | 0.00E+00       | 0.00E+00             | 0.00E+00       | 0.00E+00       | 0.00E+00       |
| 3VF                                    | 0.00E+00            | 0.00E+00       | 0.00E+00       | 0.00E+00       | 0.00E+00             | 0.00E+00       | 0.00E+00       | 0.00E+00       |
| 4VF                                    | 0.00E+00            | 0.00E+00       | 0.00E+00       | 0.00E+00       | 0.00E+00             | 0.00E+00       | 0.00E+00       | 0.00E+00       |
| 5VF                                    | 0.00E+00            | 0.00E+00       | 0.00E+00       | 0.00E+00       | 0.00E+00             | 0.00E+00       | 0.00E+00       | 0.00E+00       |
| 6VF                                    | 0.00E+00            | 0.00E+00       | 0.00E+00       | 0.00E+00       | 0.00E+00             | 0.00E+00       | 0.00E+00       | 0.00E+00       |
| 7VF                                    | 0.00E+00            | 0.00E+00       | 0.00E+00       | 0.00E+00       | 0.00E+00             | 0.00E+00       | 0.00E+00       | 0.00E+00       |
| 8VF                                    | 0.00E+00            | 0.00E+00       | 0.00E+00       | 0.00E+00       | 0.00E+00             | 0.00E+00       | 0.00E+00       | 0.00E+00       |
| 1F                                     | 0.00E+00            | 0.00E+00       | 0.00E+00       | 0.00E+00       | 0.00E+00             | 0.00E+00       | 0.00E+00       | 0.00E+00       |
| 2F                                     | 0.00E+00            | 0.00E+00       | 0.00E+00       | 0.00E+00       | 0.00E+00             | 0.00E+00       | 0.00E+00       | 0.00E+00       |
| 3F                                     | 0.00E+00            | 0.00E+00       | 0.00E+00       | 0.00E+00       | 0.00E+00             | 0.00E+00       | 0.00E+00       | 0.00E+00       |
| 4F                                     | 0.00E+00            | 0.00E+00       | 0.00E+00       | 0.00E+00       | 0.00E+00             | 0.00E+00       | 0.00E+00       | 0.00E+00       |
| 5F                                     | 0.00E+00            | 0.00E+00       | 0.00E+00       | 0.00E+00       | 0.00E+00             | 0.00E+00       | 0.00E+00       | 0.00E+00       |
| 6F                                     | 0.00E+00            | 0.00E+00       | 0.00E+00       | 0.00E+00       | 0.00E+00             | 0.00E+00       | 0.00E+00       | 0.00E+00       |
| 7F                                     | 0.00E+00            | 0.00E+00       | 0.00E+00       | 0.00E+00       | 0.00E+00             | 0.00E+00       | 0.00E+00       | 0.00E+00       |
| 8F                                     | 0.00E+00            | 0.00E+00       | 0.00E+00       | 0.00E+00       | 0.00E+00             | 0.00E+00       | 0.00E+00       | 0.00E+00       |
| 1M                                     | 0.00E+00            | 0.00E+00       | 0.00E+00       | 0.00E+00       | 0.00E+00             | 0.00E+00       | 0.00E+00       | 0.00E+00       |
| 2M                                     | 0.00E+00            | 0.00E+00       | 0.00E+00       | 0.00E+00       | 0.00E+00             | 0.00E+00       | 0.00E+00       | 0.00E+00       |
| 3M                                     | 0.00E+00            | 0.00E+00       | 0.00E+00       | 0.00E+00       | 0.00E+00             | 0.00E+00       | 0.00E+00       | 0.00E+00       |
| 4M                                     | 0.00E+00            | 0.00E+00       | 0.00E+00       | 0.00E+00       | 0.00E+00             | 0.00E+00       | 0.00E+00       | 0.00E+00       |
| 5M                                     | -2.70E-10           | 3.84E-08       | -1.19E-06      | 1.05E-04       | -4.26E-08            | 1.15E-06       | -1.07E-05      | 1.32E-04       |
| 6M                                     | -1.41E-09           | 1.98E-07       | -5.91E-06      | 5.69E-04       | -2.27E-07            | 6.08E-06       | -5.55E-05      | 7.09E-04       |
| 7M                                     | -3.16E-09           | 4.43E-07       | -1.29E-05      | 1.31E-03       | -5.16E-07            | 1.38E-05       | -1.25E-04      | 1.62E-03       |
| 8M                                     | -2.26E-09           | 3.17E-07       | -9.12E-06      | 9.47E-04       | -3.72E-07            | 9.91E-06       | -8.93E-05      | 1.17E-03       |



Table S3. (Continued)

| 2,6,10,14-Tetramethylpentadecane Aged |                     |                |                |                |                      |                |                |                |
|---------------------------------------|---------------------|----------------|----------------|----------------|----------------------|----------------|----------------|----------------|
| Lumped Species                        | Low NO <sub>x</sub> |                |                |                | High NO <sub>x</sub> |                |                |                |
|                                       | A <sup>a</sup>      | B <sup>a</sup> | C <sup>a</sup> | D <sup>a</sup> | A <sup>a</sup>       | B <sup>a</sup> | C <sup>a</sup> | D <sup>a</sup> |
| 1VF                                   | 0.00E+00            | 0.00E+00       | 0.00E+00       | 0.00E+00       | 0.00E+00             | 0.00E+00       | 0.00E+00       | 0.00E+00       |
| 2VF                                   | 0.00E+00            | 0.00E+00       | 0.00E+00       | 0.00E+00       | 0.00E+00             | 0.00E+00       | 0.00E+00       | 0.00E+00       |
| 3VF                                   | 0.00E+00            | 0.00E+00       | 0.00E+00       | 0.00E+00       | 0.00E+00             | 0.00E+00       | 0.00E+00       | 0.00E+00       |
| 4VF                                   | 0.00E+00            | 0.00E+00       | 0.00E+00       | 0.00E+00       | 0.00E+00             | 0.00E+00       | 0.00E+00       | 0.00E+00       |
| 5VF                                   | 0.00E+00            | 0.00E+00       | 0.00E+00       | 0.00E+00       | 0.00E+00             | 0.00E+00       | 0.00E+00       | 0.00E+00       |
| 6VF                                   | 0.00E+00            | 0.00E+00       | 0.00E+00       | 0.00E+00       | 0.00E+00             | 0.00E+00       | 0.00E+00       | 0.00E+00       |
| 7VF                                   | 0.00E+00            | 0.00E+00       | 0.00E+00       | 0.00E+00       | 0.00E+00             | 0.00E+00       | 0.00E+00       | 0.00E+00       |
| 8VF                                   | 0.00E+00            | 0.00E+00       | 0.00E+00       | 0.00E+00       | 0.00E+00             | 0.00E+00       | 0.00E+00       | 0.00E+00       |
| 1F                                    | 0.00E+00            | 0.00E+00       | 0.00E+00       | 0.00E+00       | 0.00E+00             | 0.00E+00       | 0.00E+00       | 0.00E+00       |
| 2F                                    | 0.00E+00            | 0.00E+00       | 0.00E+00       | 0.00E+00       | 0.00E+00             | 0.00E+00       | 0.00E+00       | 0.00E+00       |
| 3F                                    | 0.00E+00            | 0.00E+00       | 0.00E+00       | 0.00E+00       | 0.00E+00             | 0.00E+00       | 0.00E+00       | 0.00E+00       |
| 4F                                    | 0.00E+00            | 0.00E+00       | 0.00E+00       | 0.00E+00       | 0.00E+00             | 0.00E+00       | 0.00E+00       | 0.00E+00       |
| 5F                                    | 0.00E+00            | 0.00E+00       | 0.00E+00       | 0.00E+00       | 0.00E+00             | 0.00E+00       | 0.00E+00       | 0.00E+00       |
| 6F                                    | 0.00E+00            | 0.00E+00       | 0.00E+00       | 0.00E+00       | 0.00E+00             | 0.00E+00       | 0.00E+00       | 0.00E+00       |
| 7F                                    | 0.00E+00            | 0.00E+00       | 0.00E+00       | 0.00E+00       | 0.00E+00             | 0.00E+00       | 0.00E+00       | 0.00E+00       |
| 8F                                    | 0.00E+00            | 0.00E+00       | 0.00E+00       | 0.00E+00       | 0.00E+00             | 0.00E+00       | 0.00E+00       | 0.00E+00       |
| 1M                                    | 0.00E+00            | 0.00E+00       | 0.00E+00       | 0.00E+00       | 0.00E+00             | 0.00E+00       | 0.00E+00       | 0.00E+00       |
| 2M                                    | -3.99E-10           | 6.42E-08       | -3.85E-06      | 2.65E-04       | -9.58E-08            | 3.15E-06       | -3.82E-05      | 3.98E-04       |
| 3M                                    | -1.74E-09           | 2.83E-07       | -1.74E-05      | 1.18E-03       | -3.96E-07            | 1.31E-05       | -1.62E-04      | 1.74E-03       |
| 4M                                    | -5.02E-09           | 8.19E-07       | -5.10E-05      | 3.43E-03       | -1.10E-06            | 3.67E-05       | -4.58E-04      | 5.02E-03       |
| 5M                                    | -8.90E-09           | 1.46E-06       | -9.15E-05      | 6.11E-03       | -1.90E-06            | 6.38E-05       | -8.00E-04      | 8.90E-03       |
| 6M                                    | -9.34E-09           | 1.53E-06       | -9.68E-05      | 6.43E-03       | -1.96E-06            | 6.59E-05       | -8.31E-04      | 9.33E-03       |
| 7M                                    | -5.25E-09           | 8.62E-07       | -5.47E-05      | 3.62E-03       | -1.09E-06            | 3.66E-05       | -4.64E-04      | 5.24E-03       |
| 8M                                    | -1.16E-09           | 1.90E-07       | -1.21E-05      | 7.99E-04       | -2.37E-07            | 8.01E-06       | -1.02E-04      | 1.15E-03       |

|     |           |           |           |          |           |           |           |          |
|-----|-----------|-----------|-----------|----------|-----------|-----------|-----------|----------|
| 1S  | -1.56E-07 | 1.76E-05  | 1.07E-03  | 4.05E-02 | 9.89E-07  | 1.86E-05  | 3.94E-04  | 4.64E-02 |
| 2S  | -8.89E-08 | 1.26E-05  | 1.40E-05  | 1.35E-01 | 9.97E-06  | -2.66E-04 | 2.40E-03  | 1.29E-01 |
| 3S  | -1.49E-08 | 6.23E-06  | -1.07E-03 | 1.22E-01 | 6.58E-06  | -1.79E-04 | 6.00E-04  | 1.17E-01 |
| 4S  | -5.22E-08 | 1.10E-05  | -1.09E-03 | 8.98E-02 | -3.23E-06 | 1.40E-04  | -2.90E-03 | 9.82E-02 |
| 5S  | -7.61E-08 | 1.27E-05  | -7.59E-04 | 4.78E-02 | -1.08E-05 | 3.80E-04  | -5.14E-03 | 6.59E-02 |
| 6S  | -5.61E-08 | 8.88E-06  | -4.23E-04 | 2.35E-02 | -8.95E-06 | 3.08E-04  | -3.93E-03 | 3.78E-02 |
| 7S  | -2.14E-08 | 3.38E-06  | -1.49E-04 | 8.61E-03 | -3.42E-06 | 1.17E-04  | -1.48E-03 | 1.40E-02 |
| 8S  | -3.17E-09 | 4.94E-07  | -1.90E-05 | 1.18E-03 | -5.05E-07 | 1.72E-05  | -2.13E-04 | 1.96E-03 |
| 1P  | 1.21E-07  | -2.00E-05 | 8.10E-04  | 3.29E-02 | 2.78E-06  | -1.20E-04 | 2.18E-03  | 2.63E-02 |
| 2P  | 3.48E-08  | -4.34E-06 | -1.23E-04 | 6.54E-02 | 4.67E-06  | -1.46E-04 | 1.37E-03  | 6.00E-02 |
| 3P  | -1.81E-08 | 3.42E-06  | -2.66E-04 | 7.36E-02 | 2.84E-06  | -6.91E-05 | 2.56E-04  | 7.29E-02 |
| 4P  | -3.48E-08 | 5.44E-06  | -2.34E-04 | 1.12E-01 | 2.87E-06  | -5.63E-05 | -1.22E-05 | 1.13E-01 |
| 5P  | -3.80E-08 | 5.73E-06  | -2.10E-04 | 1.17E-01 | 2.65E-06  | -4.74E-05 | -1.11E-04 | 1.19E-01 |
| 6P  | -2.19E-08 | 3.28E-06  | -1.16E-04 | 6.74E-02 | 1.40E-06  | -2.34E-05 | -9.99E-05 | 6.85E-02 |
| 7P  | -5.13E-09 | 7.48E-07  | -2.41E-05 | 1.58E-02 | 2.29E-07  | -2.51E-06 | -5.10E-05 | 1.62E-02 |
| 8P  | 0.00E+00  | 0.00E+00  | 0.00E+00  | 0.00E+00 | 0.00E+00  | 0.00E+00  | 0.00E+00  | 0.00E+00 |
| 1MA | 0.00E+00  | 0.00E+00  | 0.00E+00  | 0.00E+00 | -1.00E-06 | 1.00E-04  | 9.00E-04  | 0.00E+00 |
| 2MA | 0.00E+00  | 0.00E+00  | 0.00E+00  | 0.00E+00 | 0.00E+00  | 0.00E+00  | 0.00E+00  | 0.00E+00 |
| 3MA | 0.00E+00  | 0.00E+00  | 0.00E+00  | 0.00E+00 | 0.00E+00  | 0.00E+00  | 0.00E+00  | 0.00E+00 |
| 4MA | 0.00E+00  | 0.00E+00  | 0.00E+00  | 0.00E+00 | 0.00E+00  | 0.00E+00  | 0.00E+00  | 0.00E+00 |
| 5MA | 0.00E+00  | 0.00E+00  | 0.00E+00  | 0.00E+00 | 0.00E+00  | 0.00E+00  | 0.00E+00  | 0.00E+00 |
| 6MA | 0.00E+00  | 0.00E+00  | 0.00E+00  | 0.00E+00 | 0.00E+00  | 0.00E+00  | 0.00E+00  | 0.00E+00 |
| 7MA | 0.00E+00  | 0.00E+00  | 0.00E+00  | 0.00E+00 | 0.00E+00  | 0.00E+00  | 0.00E+00  | 0.00E+00 |
| 8MA | 0.00E+00  | 0.00E+00  | 0.00E+00  | 0.00E+00 | 0.00E+00  | 0.00E+00  | 0.00E+00  | 0.00E+00 |

<sup>a</sup> The stoichiometric coefficient value is calculated by  $\alpha = A * (HC/NO_x)^3 + B * (HC/NO_x)^2 + C * (HC/NO_x) + D$ , where HC/NO<sub>x</sub> is defined as: ppb Carbon / NO<sub>x</sub> ppb

## Section S5. Gas simulations of chamber experiments (Table 1) by using the CB6 Ozone model

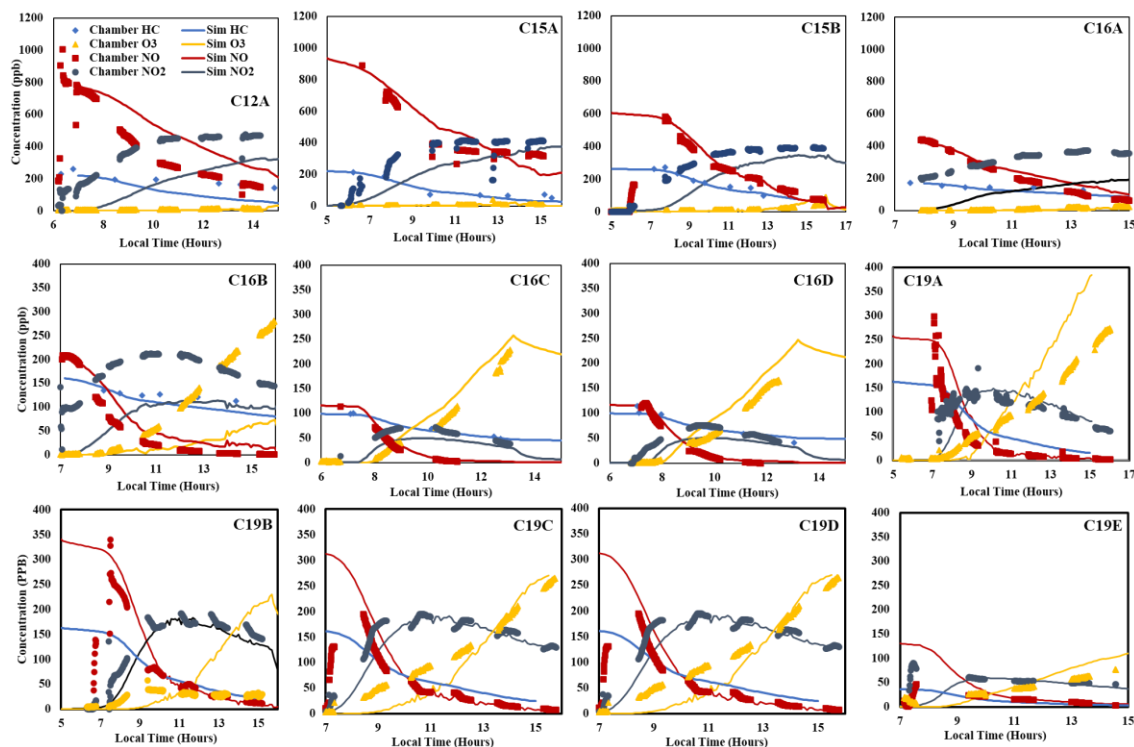

**Figure S2.** Chamber measurements and simulated concentrations of HC, Ozone, NO, and NO<sub>2</sub> of experiments performed in this study reported in Table 1. Chamber measured concentrations of Tetramethylpentadecane (C19A-E) are not reported as this compound is too low volatility to be detected by the GC-FID appropriately; chamber simulations were performed with initial values of tetramethylpentadecane which were calculated according to the amount injected into the chamber assuming 95% injection efficiency.

## Section S5. Sunlight profile used for sensitivity and uncertainty analyses

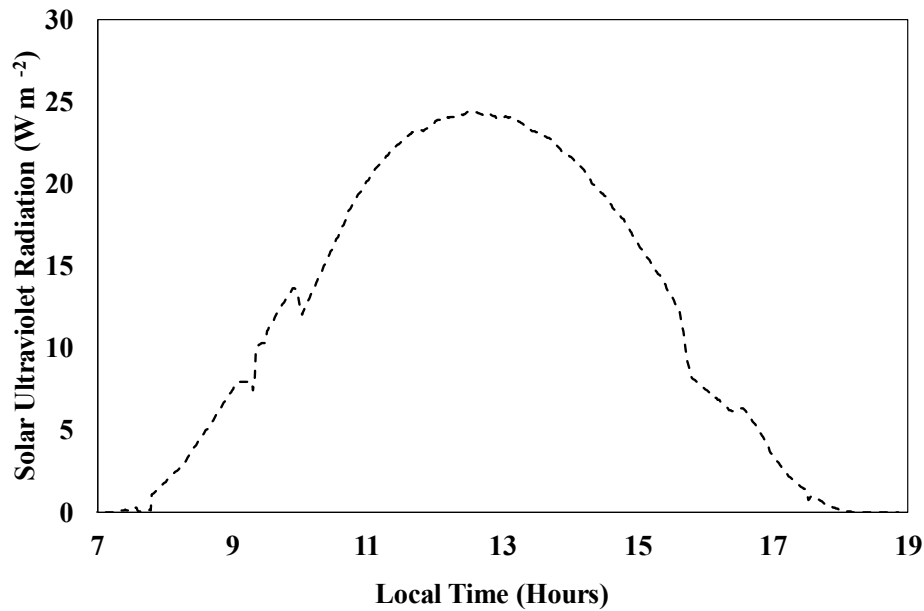

**Figure S3.** Time profile of reference sunlight radiance measure using Total Ultra-Violet Radiation (TUV) in the UF-APHOR on 01/20/20. This sunlight profile is used for all sensitivity and uncertainty tests in this paper. This is the same sunlight profile used by Madhu et al. (2023) for sensitivity and uncertainty analysis.



**Section S4. Parameters used to generate lumping arrays and hydroxyl radical rate constants for branched alkanes used in sensitivity tests**

**Table S4.** Parameters used to generate lumping arrays and hydroxyl radical rate constants for branched alkanes used in branching sensitivity test

| Branching | Autoxidation Reduction Factor | Linear alkane with closest Vapor Pressure | Reaction Rate with Hydroxyl Radical ( $S^{-1}$ ) <sup>a</sup> | Structure                                                                             |
|-----------|-------------------------------|-------------------------------------------|---------------------------------------------------------------|---------------------------------------------------------------------------------------|
| Linear    | 1                             | N/A                                       | 1.82 E-11                                                     |    |
| 1 Branch  | 0.98                          | C14                                       | 1.82 E-11                                                     |    |
| 2 Branch  | 0.84                          | C14                                       | 1.84 E-11                                                     |    |
| 3 Branch  | 0.78                          | C13                                       | 1.87 E-11                                                     |    |
| 4 Branch  | 0.72                          | C12                                       | 1.87 E-11                                                     |  |

<sup>a</sup>Rate constants calculated using structure-reactivity relationship (Kwok and Atkinson, 1995)

**Table S5.** Parameters used to generate lumping arrays and hydroxyl radical rate constants for branched alkanes used in NO<sub>x</sub> and temperature sensitivity tests

| Carbon Number | Autoxidation Reduction Factor | Linear alkane with Closest Vapor Pressure | Reaction Rate with Hydroxyl Radical ( $S^{-1}$ ) <sup>a</sup> | Structure                                                                             |
|---------------|-------------------------------|-------------------------------------------|---------------------------------------------------------------|---------------------------------------------------------------------------------------|
| C12           | 0.84                          | C10                                       | 1.45 E-11                                                     | 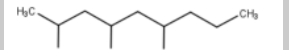 |
| C15           | 0.78                          | C13                                       | 1.87 E-11                                                     |  |
| C18           | 0.72                          | C16                                       | 2.30 E-11                                                     |  |

<sup>a</sup>Rate constants calculated using structure-reactivity relationship (Kwok and Atkinson, 1995).

## References

Kwok, E. S. C. and Atkinson, R.: Estimation of hydroxyl radical reaction rate constants for gas-phase organic compounds using a structure-reactivity relationship: An update, *Atmospheric Environment*, 29, 1685-1695, [https://doi.org/10.1016/1352-2310\(95\)00069-B](https://doi.org/10.1016/1352-2310(95)00069-B), 1995.

Madhu, A., Jang, M., and Deacon, D.: Modeling the influence of chain length on secondary organic aerosol (SOA) formation via multiphase reactions of alkanes, *Atmos. Chem. Phys.*, 23, 1661-1675, 10.5194/acp-23-1661-2023, 2023.
